# Supplementary material
Source: HighWire-hosted journal article supplement (https://www.annfammed.org/highwire/filestream/9013/field_highwire_adjunct_files/0/Sit_Supp_Apps.pdf)
Supplement: Sit_Supp_Apps.pdf [file Sit_Supp_Apps.pdf]

**Supplemental materials for:**

Sit RW, Chan KK, Zou D, et al. Clinic-based patellar mobilization therapy for knee osteoarthritis: a randomized clinical trial. *Ann Fam Med*. 2018;16(6):521-529.

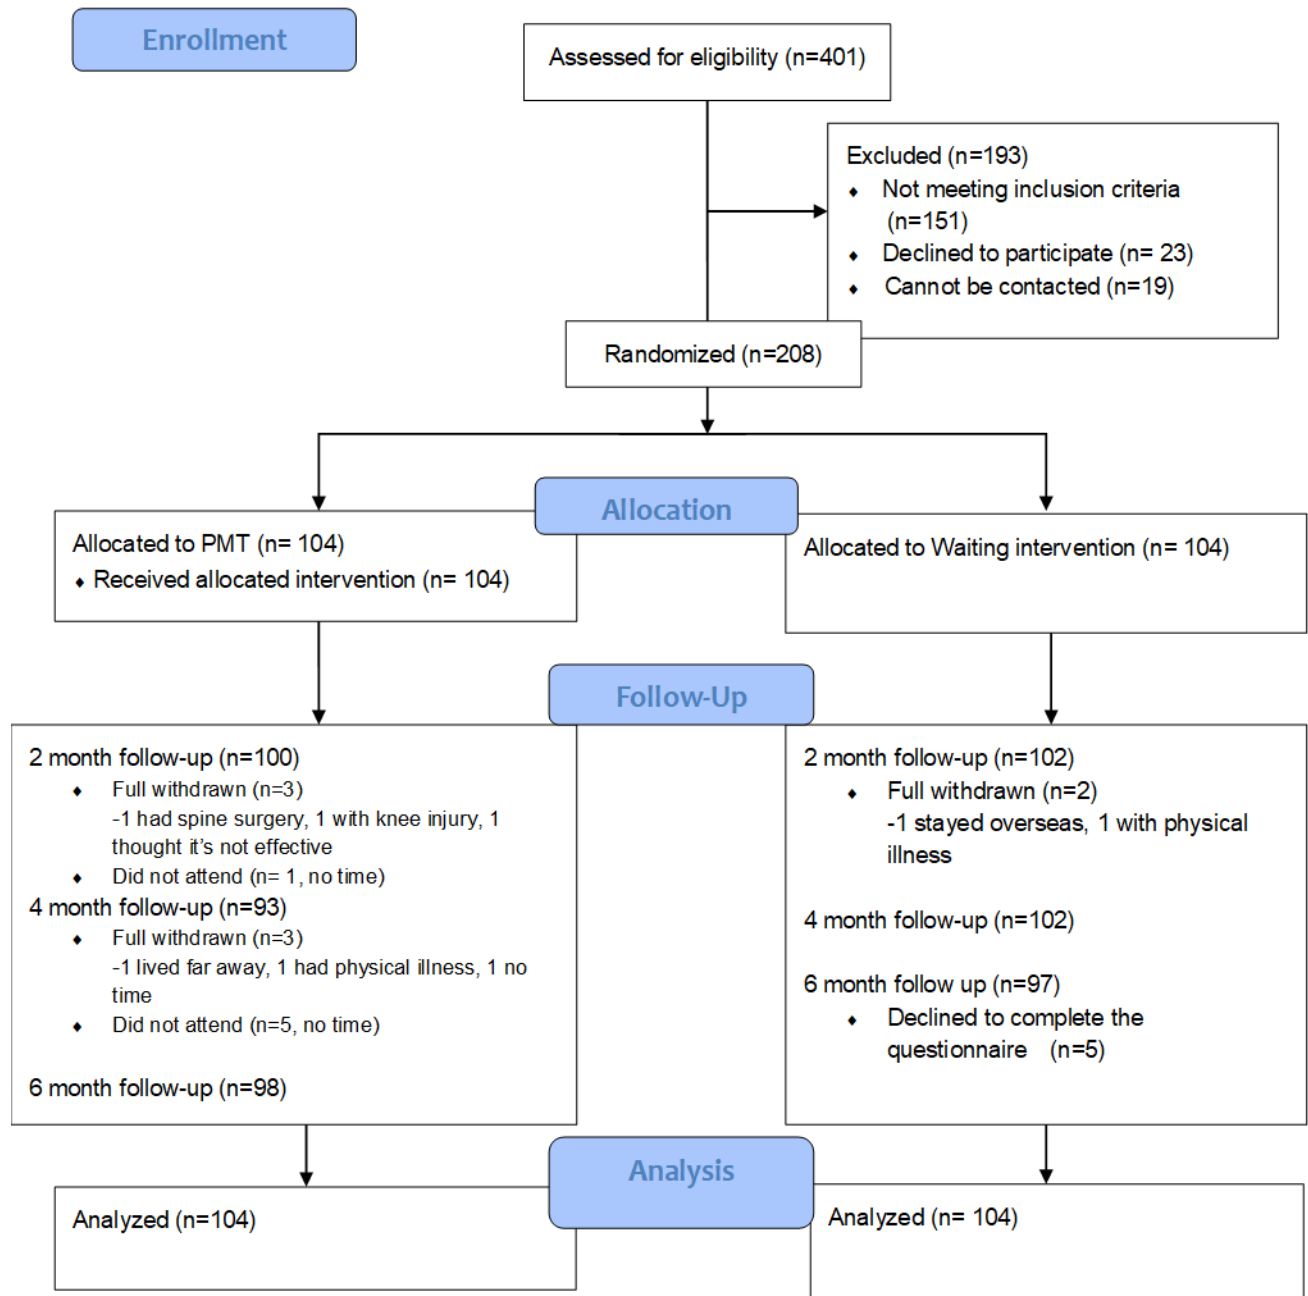

---

**Supplemental Table**

---

|                                               | Intervention group |      | Control group |      |
|-----------------------------------------------|--------------------|------|---------------|------|
|                                               | mean               | SD   | mean          | SD   |
| <b>Imputed Data Analysis</b>                  |                    |      |               |      |
| week 0                                        | 46.2               | 21.6 | 47.7          | 19.8 |
| week 24                                       | 28.9               | 24.1 | 44.6          | 22.8 |
| <b>Per protocol analysis with imputation#</b> |                    |      |               |      |
| week 0                                        | 47.6               | 21.3 | 47.6          | 19.7 |
| week 24                                       | 29.5               | 23.3 | 44.8          | 22.4 |

---
